# Supplementary material for: Fission Yeast Swi5-Sfr1 Protein Complex, an Activator of Rad51 Recombinase, Forms an Extremely Elongated Dogleg-shaped Structure
Source: PubMed Central journal article supplement — J Biol Chem. 2011 Oct 27;286(50):43569–76. doi: 10.1074/jbc.M111.303339 (PMC3234860; doi:10.1074/jbc.m111.303339), 2011-10-27
Supplement: supp_M111.303339_jbc.M111.303339-1.pdf [file supp_M111.303339_jbc.M111.303339-1.pdf]

## SUPPLEMENTAL DATA

### The Fission Yeast Swi5-Sfr1 Complex, an Activator of Rad51 Recombinase, Forms an Extremely Elongated Dogleg-Shaped Structure\*

Yuichi Kokabu<sup>1</sup>, Yasuto Murayama<sup>2</sup>, Naoyuki Kuwabara<sup>3</sup>, Tomotaka Oroguchi<sup>1</sup>, Hiroshi Hashimoto<sup>1</sup>, Yasuhiro Tsutsui<sup>2</sup>, Naohito Nozaki<sup>4</sup>, Satoko Akashi<sup>1</sup>, Satoru Unzai<sup>1</sup>, Toshiyuki Shimizu<sup>3</sup>, Hiroshi Iwasaki<sup>2</sup>, Mamoru Sato<sup>1</sup>, and Mitsunori Ikeguchi<sup>1</sup>

<sup>1</sup>Graduate School of Nanobioscience, Yokohama City University, 1-7-29 Suehiro-cho, Tsurumi-ku, Yokohama, 230-0045, Japan.

<sup>2</sup>Graduate School of Bioscience & Biotechnology, Tokyo Institute of Technology, 4259, Nagatsuda-cho, Midori-ku, Yokohama, 226-8501, Japan.

<sup>3</sup>Graduate School of Pharmaceutical Sciences, University of Tokyo, 7-3-1 Hongo, Bunkyo-ku, Tokyo, 113-0033, Japan.

<sup>4</sup>Bio-Frontier Research Center, Tokyo Institute of Technology, 4259, Nagatsuda-cho, Midori-ku, Yokohama, 226-8501, Japan.

#### Table of contents

**Figure S1.** *Determination of the recognition sequence of the monoclonal antibodies.*

**Figure S2.** *Swi5-Sfr1 and Fab fragments of Sfr1-specific monoclonal antibodies form stable complexes.*

**Figure S3.** *Disorder probability of Sfr1.*

Figure S1

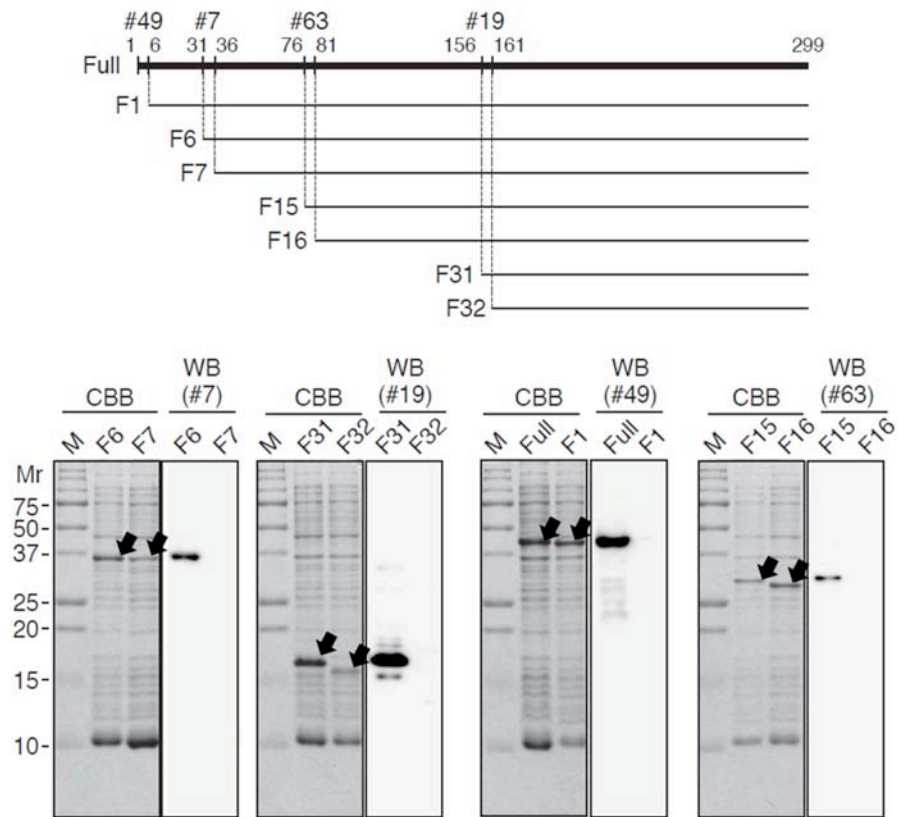

**Figure S1.** Determination of the recognition sequence of the monoclonal antibodies. **Upper.** Schematic of the series of the Sfr1 N-terminal truncation constructs. Every five amino acid residues were truncated from the N-terminus (F1 to F40) and the truncated Sfr1 peptides were expressed in a T7 expression system. Only the truncated constructs important for the determination of the recognition sequence are presented in the panel. **Lower.** A pair of the important crude extracts of *E. coli* cells expressing the Sfr1 peptides was separated by SDS-PAGE, followed by visualization with Coomassie brilliant blue (CBB) or immunoblotting with four specific antibodies (#7, #19, #49 and #63) Black arrow-heads in the CBB-stained gels correspond to the Sfr1 protein.

Figure S2

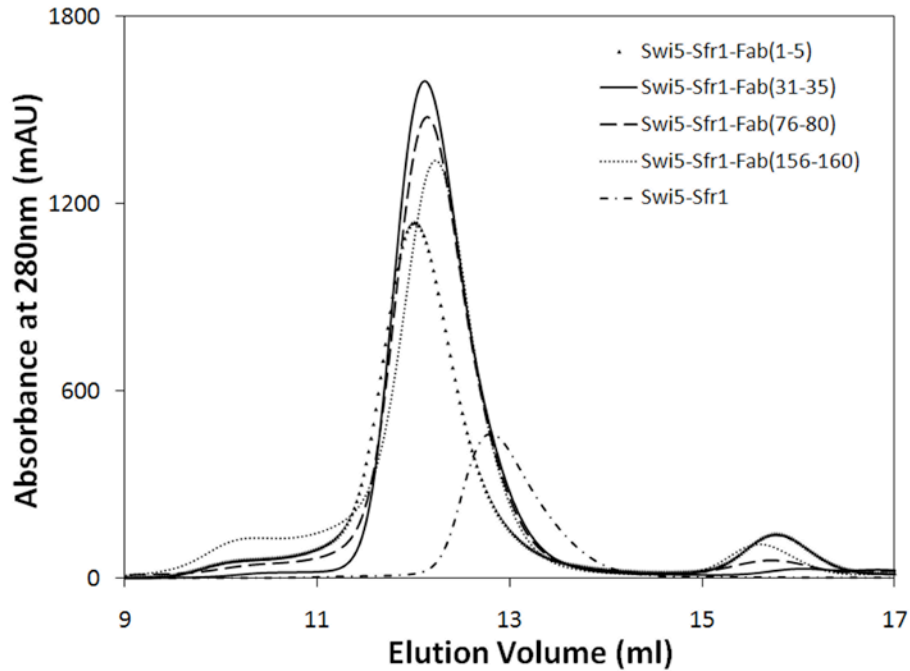

**Figure S2.** *Swi5-Sfr1 and Fab fragments of Sfr1-specific monoclonal antibodies form stable complexes.* Gel filtration for the Swi5-Sfr1 and Swi5-Sfr1-Fab complexes. Four Fab fragments that bind to distinct sites of Sfr1 were applied. The binding sites of the four Fabs, #7, #19, #49 and #65, correspond to 31-35, 156-160, 1-5, and 76-80 of Sfr1, respectively. Elution profiles for the Swi5-Sfr1-Fab complexes containing Fab (1-5), Fab (31-35), Fab (76-80), and Fab (156-160) are shown in triangles, thin solid lines, dashed lines, and dotted lines, respectively. The elution profile of the Swi5-Sfr1 complex alone is also shown.

Figure S3

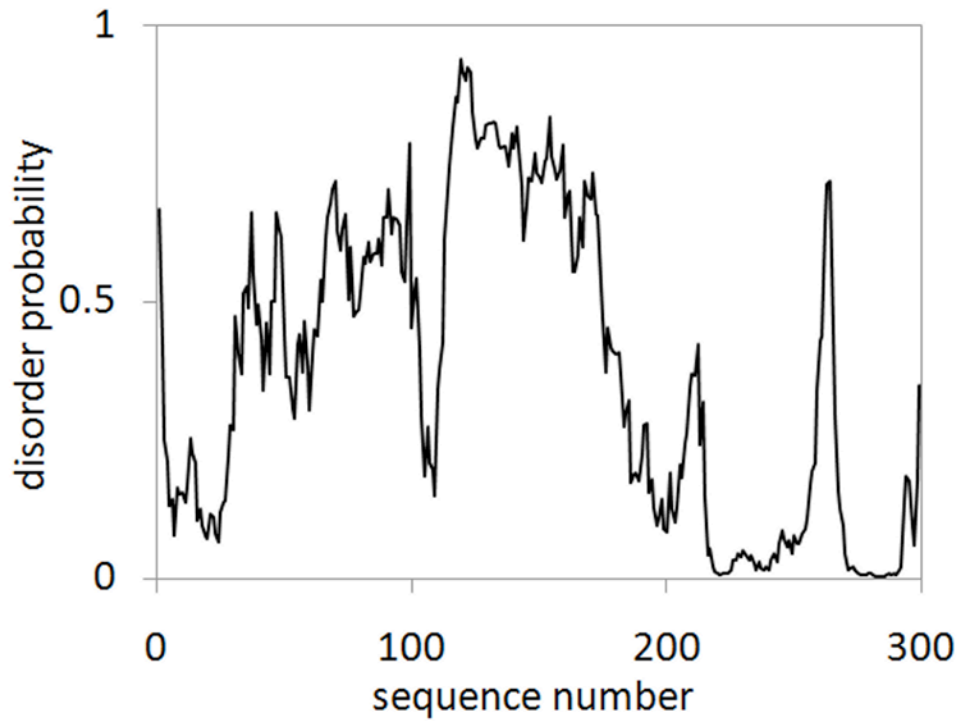

**Figure S3.** *Disorder probability of Sfr1.* Disorder probability of Sfr1 was calculated from the primary sequence by using DISOPRED. The N-terminal half of Sfr1 has high IDP propensity.
